# Supplementary material
Source: bioRxiv or medRxiv preprint supplement (https://www.medrxiv.org/highwire/filestream/68962/field_highwire_adjunct_files/3/19005579-4.pdf)
Supplement: Supplementary file [file 19005579-4.pdf]

# feasibility analysis

```
# Supplemental feasibility assessment:
# NRF = Nutrient Rich Foods Index (NRF9.3), Fulgoni 2009 and Drewnowski 2018

# Read in file with weekday lunches by food source and NRF9.3 -----
nrf <- fread("tabs/nhanes.csv")

# Declare NHANES cycles as pre-passage, post-passage, post-implementation --
nrf$post3 <- as.factor(
  ifelse(nrf$cycle == 0, 0, #2009-2010
    ifelse(nrf$cycle == 1, 1, #2011-2012
      ifelse(nrf$cycle > 1, 2, NA))) #2013-2016
)

# Declare survey design -----
nrfdesign <- svydesign(
  ids = ~ SDMVPSU,
  strata = ~ SDMVSTRA,
  weights = ~ nrftwt,
  nest = TRUE,
  data = nrf
)

# Survey GLM showing significant increases in NRF9.3 score for school meals
# and no changes for non-school meals in the post-implementation period.
```

```

# Intercept = NRF9.3 score for non-school lunches in pre-passage period
# post31 = Change in NRF9.3 for non-school lunches in post-passage period
# post32 = Change in NRF9.3 for non-school lunches in post-
# implementation period
# schoolfood = Difference in NRF9.3 score for school (vs non-school) lunches
# in pre-passage period
# post31:schoolfood = Additional change in NRF9.3 score for school lunches
# in post-passage period
# post32:schoolfood = Additional change in NRF9.3 score for school lunches
# in post-implementation period

summary(svyglm(nrf ~ post3*schoolfood, design = nrfdesign))

```

```

##
## Call:
## svyglm(formula = nrf ~ post3 * schoolfood, design = nrfdesign)
##
## Survey design:
## svydesign(ids = ~SDMVPSU, strata = ~SDMVSTRA, weights = ~nrftwt,
##   nest = TRUE, data = nrf)
##
## Coefficients:
##
##             Estimate Std. Error t value Pr(>|t|)
## (Intercept)    365.205     11.462   31.863 < 2e-16 ***
## post31          3.093     19.867    0.156  0.87682
## post32          4.235     14.930    0.284  0.77766
## schoolfood     102.723     21.444    4.790 1.19e-05 ***

```

```
## post31:schoolfood 19.947 33.815 0.590 0.55757
## post32:schoolfood 68.889 25.258 2.727 0.00843 **
## ---
## Signif. codes: 0 '***' 0.001 '**' 0.01 '*' 0.05 '.' 0.1 ' ' 1
##
## (Dispersion parameter for gaussian family taken to be 41073.41)
##
## Number of Fisher Scoring iterations: 2
```

```
# Interpretation: School meals had greater nutritional density than non-
# school meals in the pre-passage period.
# Non-school meal nutritional density did not change in the post-passage
# or post-implementation period.
# School meal nutritional density improved by 22 points following passage
# of HHFKA and by 73 points following implementation of HHFKA.
```
